# Supplementary material for: A Lifestyle (Dietary) Intervention Reduces Tiredness in Children with Subclinical Hypothyroidism, a Randomized Controlled Trial
Source: PubMed Central journal article supplement (PMC7277354; doi:10.3390/ijerph17103689), 2020-05-23
Supplement: ijerph-17-03689-s001.pdf [file ijerph-17-03689-s001.pdf]

Table S1. Operating mechanisms of food products on the thyroid or immune system.

| Products/nutrition          | Suggested mechanism of action and association with thyroid function.                                                                                                                                                                                                                                   |
|-----------------------------|--------------------------------------------------------------------------------------------------------------------------------------------------------------------------------------------------------------------------------------------------------------------------------------------------------|
| <b>Green vegetables</b>     | <i>5x/week for supper</i>                                                                                                                                                                                                                                                                              |
| <b>Vitamin A</b>            | Improves efficacy of iodine uptake and can have a beneficial impact on thyroid function and size <sup>1-3</sup> . Modulates TSH production by influencing the expression of pituitary TSH $\beta$ mRNA <sup>4</sup> .                                                                                  |
| <b>Vitamin C</b>            | Improves iron-uptake, in persons with hypothyroidism, it improves the abnormalities in serum free T4, T3 and TSH concentrations <sup>5</sup> .                                                                                                                                                         |
| <b>Zinc</b>                 | Zinc levels are positively correlated with free T3-levels <sup>6</sup> .                                                                                                                                                                                                                               |
| <b>Beef</b>                 | <i>3x/week for supper</i>                                                                                                                                                                                                                                                                              |
| <b>Iron</b>                 | Providing iron along with iodine results in greater improvements in thyroid function <sup>3</sup> . Both iron deficiency and iron excess can influence the functioning of the innate and adaptive arms of the immune system, thereby it contributes to a more stable thyroid function <sup>7,8</sup> . |
| <b>Iodine</b>               | Chronic iodine deficiency increases the TSH concentration <sup>9</sup> .                                                                                                                                                                                                                               |
| <b>Vitamin A, C, zinc</b>   | Stated above.                                                                                                                                                                                                                                                                                          |
| <b>Selenium</b>             | Selenium deficiency impairs thyroid hormone metabolism by inhibiting the synthesis and activity of the iodothyroinine deiodinases, which convert T4 into T3 <sup>10</sup> .                                                                                                                            |
| <b>Whole dairy products</b> | <i>200 mL whole milk a day / whole butter on bread daily</i>                                                                                                                                                                                                                                           |
| <b>Vitamin D</b>            | Has a role in the maintenance of immune-homeostasis. Deficiency of vitamin D is linked to the presence of antithyroid antibodies and abnormal thyroid functions <sup>11</sup> .                                                                                                                        |
| <b>Fatty acids</b>          | Signs of faster immune maturation with supplementation <sup>12</sup> .                                                                                                                                                                                                                                 |

## References

- Zimmermann, M. B., Interactions of vitamin A and iodine deficiencies: effects on the pituitary-thyroid axis. *Int J Vitam Nutr Res* **2007**, *77* (3), 236-40.
- Zimmermann, M. B.; Wegmuller, R.; Zeder, C.; Chaouki, N.; Torresani, T., The effects of vitamin A deficiency and vitamin A supplementation on thyroid function in goitrous children. *J Clin Endocrinol Metab* **2004**, *89* (11), 5441-7.
- Hess, S. Y., The impact of common micronutrient deficiencies on iodine and thyroid metabolism: the evidence from human studies. *Best Pract Res Clin Endocrinol Metab* **2010**, *24* (1), 117-32.
- Brown, N. S.; Smart, A.; Sharma, V.; Brinkmeier, M. L.; Greenlee, L.; Camper, S. A.; Jensen, D. R.; Eckel, R. H.; Krezel, W.; Chambon, P.; Haugen, B. R., Thyroid hormone resistance and increased metabolic rate in the RXR-gamma-deficient mouse. *J Clin Invest* **2000**, *106* (1), 73-9.
- Jubiz, W.; Ramirez, M., Effect of vitamin C on the absorption of levothyroxine in patients with hypothyroidism and gastritis. *J Clin Endocrinol Metab* **2014**, *99* (6), E1031-4.

6. Ertek, S.; Cicero, A. F.; Caglar, O.; Erdogan, G., Relationship between serum zinc levels, thyroid hormones and thyroid volume following successful iodine supplementation. *Hormones (Athens)* **2010**, *9* (3), 263-8.
7. Ekiz, C.; Agaoglu, L.; Karakas, Z.; Gurel, N.; Yalcin, I., The effect of iron deficiency anemia on the function of the immune system. *Hematol J* **2005**, *5* (7), 579-83.
8. Cherayil, B. J., Iron and immunity: immunological consequences of iron deficiency and overload. *Arch Immunol Ther Exp (Warsz)* **2010**, *58* (6), 407-15.
9. Zimmermann, M. B., Iodine deficiency. *Endocr Rev* **2009**, *30* (4), 376-408.
10. Arthur, J. R.; Nicol, F.; Beckett, G. J., The role of selenium in thyroid hormone metabolism and effects of selenium deficiency on thyroid hormone and iodine metabolism. *Biol Trace Elem Res* **1992**, *34* (3), 321-5.
11. Yin, K.; Agrawal, D. K., Vitamin D and inflammatory diseases. *J Inflamm Res* **2014**, *7*, 69-87.
12. Damsgaard, C. T.; Lauritzen, L.; Kjaer, T. M.; Holm, P. M.; Fruekilde, M. B.; Michaelsen, K. F.; Frokiaer, H., Fish oil supplementation modulates immune function in healthy infants. *J Nutr* **2007**, *137* (4), 1031-6.
